# Supplementary material for: The epidermal growth factor receptor regulates cofilin activity and promotes transmissible gastroenteritis virus entry into intestinal epithelial cells
Source: PubMed Central journal article supplement (PMC4914279; doi:10.18632/oncotarget.7723), 2016-02-25
Supplement: oncotarget-07-12206-s001.pdf [file oncotarget-07-12206-s001.pdf]

# The epidermal growth factor receptor regulates cofilin activity and promotes transmissible gastroenteritis virus entry into intestinal epithelial cells

## Supplementary Material

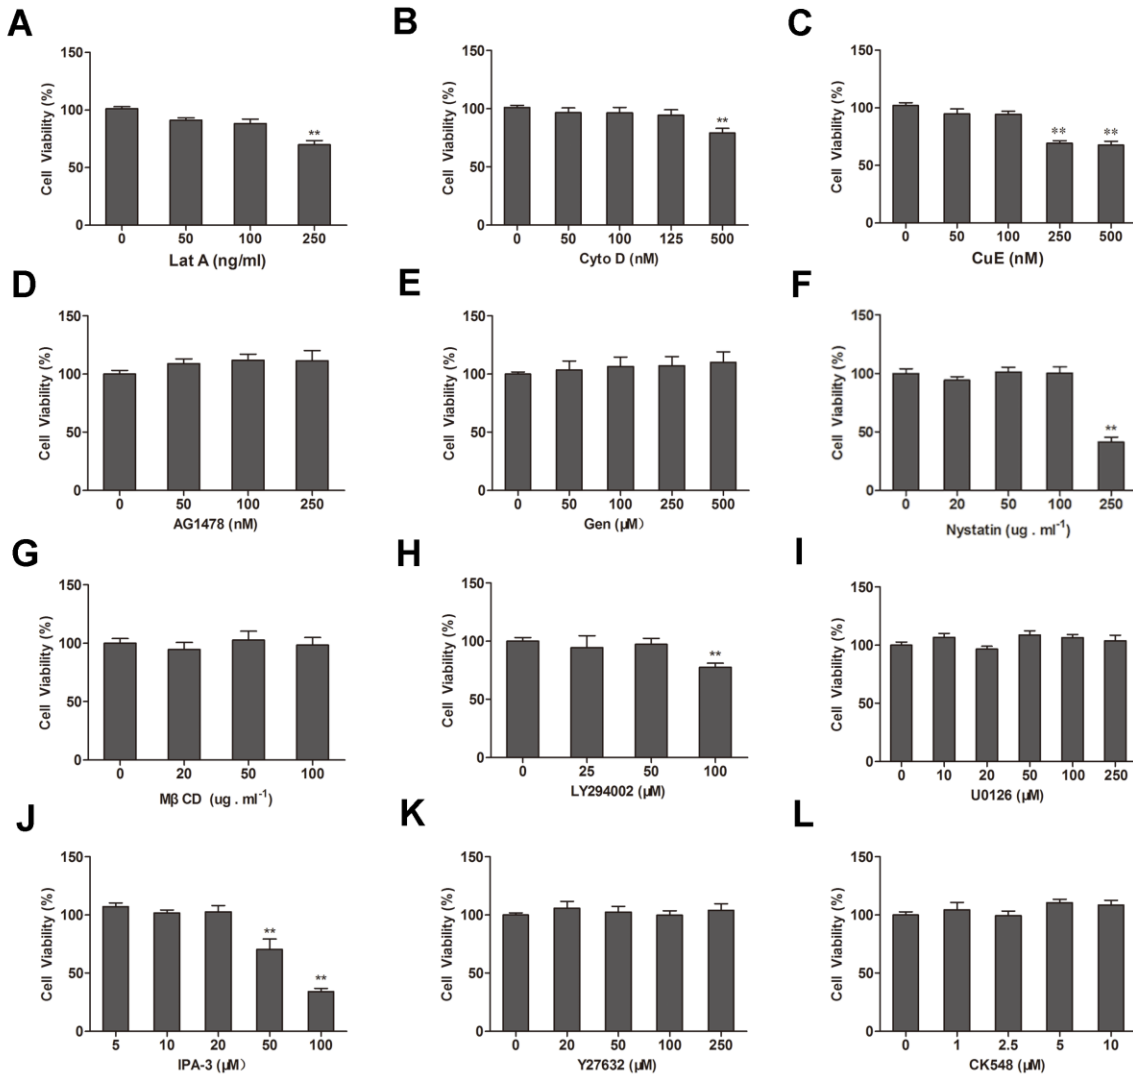

**Figure S1: Cytotoxicity of chemical inhibitors.** The cytotoxicity of chemical inhibitors were determined with a MTT [3-(4,5-dimethyl-2-thiazolyl)-2,5-diphenyl-2H-tetrazolium bromide] assay. Statistical significance was assessed by student's t-test (\*)  $0.01 < p < 0.05$ , (\*\*)  $p < 0.01$ , all of the experiments were performed for three separate experiments.

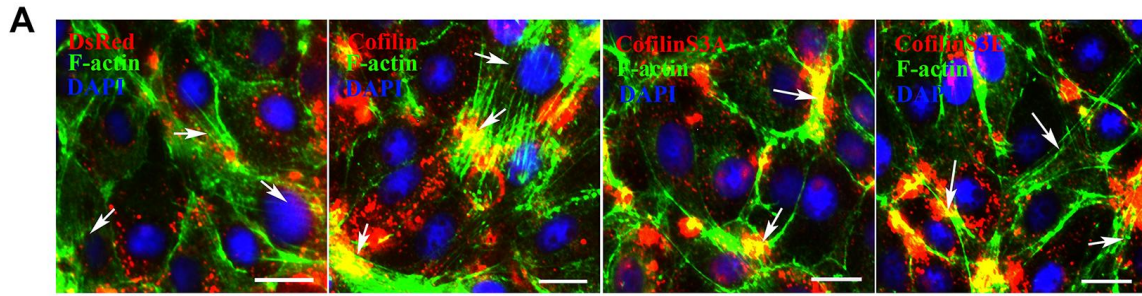

**Figure S2: WT cofilin and mutants cofilins (S3A and S3E) destroy the arrangement of actin.** Cells were transfected with lentiviral constructs expressing WT cofilin and mutant cofilins S3A and S3E. After incubation for 48 h, actin was stained with phalloidin-TRITC (Green).

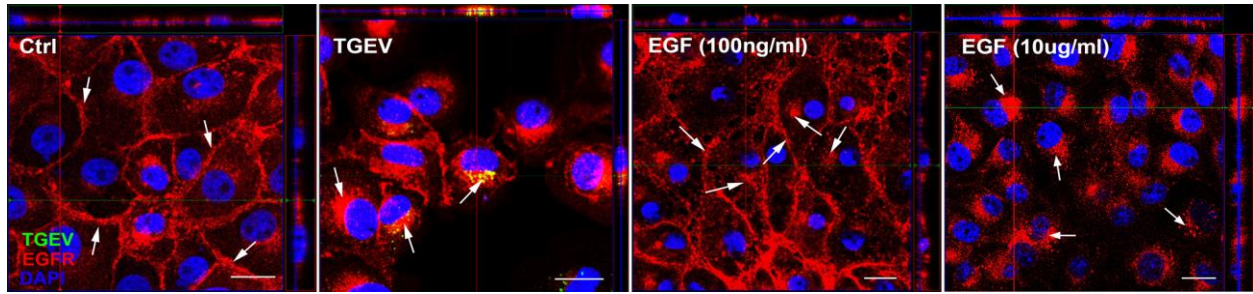

**Figure S3: TGEV infection causes EGFR endocytosis.** IPEC-J2 cells were infected with TGEV (MOI=2) or were stimulated with EGF (100ng/ml) at 4 °C for 1h then 37 °C for 30 min. The cells were fixed and stained with mouse anti-TGEV mAb followed by DyLight 488-conjugated goat anti-mouse IgG and rabbit anti-EGFR pAb followed by DyLight 594-conjugated goat anti-rabbit IgG, cells were examined by confocal microscope.

**Table S1: List of pharmacological inhibitors.**

| <b>Inhibitor</b>             | <b>Specificity Functions</b>       | <b>Supplier</b> |
|------------------------------|------------------------------------|-----------------|
| <b>Latrunculin A</b>         | sequesters actin monomers          | Life            |
| <b>Cytochalasin D</b>        | actin depolymerizing agent         | Life            |
| <b>Cucurbitacin E</b>        | stabilizes actin polymers          | Sigma           |
| <b>AG1478</b>                | EGFR specific inhibitor            | Sigma           |
| <b>Genistein</b>             | Receptor tyrosine kinase inhibitor | Sigma           |
| <b>Nystatin</b>              | sequesters and blocks cholesterol  | Sigma           |
| <b>M<math>\beta</math>CD</b> | Deplete cholesterol                | Sigma           |
| <b>LY294002</b>              | Specific PI3K inhibitor            | Sigma           |
| <b>U0126</b>                 | MEK1/2 inhibitor                   | Sigma           |
| <b>IPA-3</b>                 | PAK-1 inhibitor                    | Sigma           |
| <b>Y27632</b>                | ROCK-1 inhibitor                   | Sigma           |
| <b>CK548</b>                 | Arp2/3 complex inhibitor           | Sigma           |

**Table S2: List of antibodies.**

| <b>Name</b>       | <b>Antibody information</b>                                             | <b>Supplier</b> | <b>Catalog Number</b> |
|-------------------|-------------------------------------------------------------------------|-----------------|-----------------------|
| <b>EGFR</b>       | EGF Receptor (D38B1) XP® Rabbit mAb                                     | CST             | 4267                  |
| <b>p-EGFR</b>     | Phospho-EGF Receptor (Tyr1068) (D7A5) XP<br>® Rabbit mAb                | CST             | 3777                  |
| <b>p-LIMK1</b>    | Phospho-LIMK1 (Thr508) Rabbit mAb                                       | CST             | 3841                  |
| <b>Akt</b>        | Akt1 (C73H10) Rabbit mAb                                                | CST             | 2938                  |
| <b>p-Akt</b>      | Phospho-Akt (Ser473) (193H12) Rabbit mAb                                | CST             | 4058                  |
| <b>ERK1/2</b>     | p44/42 MAPK (Erk1/2) (137F5) Rabbit mAb                                 | CST             | 4695                  |
| <b>p-ERK1/2</b>   | Phospho-p44/42 MAPK (Thr202/Tyr204)<br>(D13.14.4E) XP™ Rabbit mAb       | CST             | 4370                  |
| <b>Cofilin</b>    | Cofilin Rabbit pAb                                                      | CST             | 3312                  |
| <b>p-Cofilin</b>  | Phospho-Cofilin (Ser3) (77G2) Rabbit mAb                                | CST             | 3313                  |
| <b>HA</b>         | Mouse monoclonal Antibody to HA                                         | CMCTAG          | AT0024                |
| <b>TGEV</b>       | TGE Virus Mouse mAb                                                     | Santa Cruz      | sc-52436              |
| <b>Dylight488</b> | Goat anti-Mouse IgG (H+L) Secondary<br>Antibody, DyLight 488 conjugate  | Thermo          | 35502                 |
|                   | Goat anti-Mouse IgG(H+L) Secondary<br>Antibody, DyLight 594 conjugate   | Thermo          | 35510                 |
| <b>Dylight594</b> | Goat anti-Rabbit IgG (H+L) Secondary<br>Antibody, DyLight 594 conjugate | Thermo          | 35560                 |

**TableS3: List of primer sequences used in PCR**

| Name              | Primer sequence(5'-3')                                                                                      | Vector     |
|-------------------|-------------------------------------------------------------------------------------------------------------|------------|
| <b>Cofilin</b>    | F: ACCCAAGCTGgctagcATGGCCTCCGGTGTG (NheI)<br>R: GCTCGGTACCaagcttCAAAGGCTTGCCCTCCAG (HindIII)                | pcDNA3.1   |
| <b>Cofilin</b>    | F: CGAGCTCAAGCTTCgaattcATGGCCTCCGGTGTGGCT (EcoRI)<br>R: GTGGCGACCGGTggatccCAAAGGCTTGCCCTCCAG (BamHI)        | pLVX-DsRed |
| <b>CofilinS3A</b> | F: CGAGCTCAAGCTTCgaattcATGGCCGCAGGTGTGGCT (EcoRI)<br>R: GTGGCGACCGGTggatccCAAAGGCTTGCCCTCCAG (BamHI)        | pLVX-DsRed |
| <b>CofilinS3E</b> | F: CGAGCTCAAGCTTCgaattcATGGCCGAAGGTGTGGCT (EcoRI)<br>R: GTGGCGACCGGTggatccCAAAGGCTTGCCCTCCAG (BamHI)        | pLVX-DsRed |
| <b>RhoA</b>       | F: ACCCAAGCTGgctagcATGGCTGCCATCAGGAAG (NheI)<br>R: GCTCGGTACCaagcttCAAGACAAGGCACCCAGAT (HindIII)            | pcDNA3.1   |
| <b>RhoA</b>       | F: CGAGCTCAAGCTTCgaattcATGGCTGCCATCAGGAAG (EcoRI)<br>R: GTGGCGACCGGTggatccCAAGACAAGGCACCCAGAT (BamHI)       | pLVX-DsRed |
| <b>N19RhoA</b>    | F: CGAGCTGAAGCTTCgaattcATGGCTGCCATCAGGAAG (EcoRI)<br>R: GCTCGGTACCaagcttCAAGACAAGGCACCCAGAT (HindIII)       | pLVX-DsRed |
| <b>L63RhoA</b>    | F: CGAGCTCAAGCTTCgaattcATGGCTGCCATCAGGAAG (EcoRI)<br>R: GTGGCGACCGGTggatccCAAGACAAGGCACCCAGAT (BamHI)       | pLVX-DsRed |
| <b>Rac1</b>       | F: ACCCAAGCTGgctagcATGCAGGCCATCAAGTGTGT (NheI)<br>R: GCTCGGTACCaagcttCAACAGCAGGCACTTCCTCT (HindIII)         | pcDNA3.1   |
| <b>Rac1</b>       | F: CGAGCTCAAGCTTCgaattcATGCAGGCCATCAAGTGT (EcoRI)<br>R: GTGGCGACCGGTggatccCAACAGCAGGCACTTCCT (BamHI)        | pLVX-DsRed |
| <b>N17Rac1</b>    | F: CGAGCTGAAGCTTCgaattcATGCAGGCCATCAAGTGT (EcoRI)<br>R: GTGGCGACCGGTggatccCAACAGCAGGCACTTCCT (BamHI)        | pLVX-DsRed |
| <b>L61Rac1</b>    | F: CGAGCTCAAGCTTCgaattcATGCAGGCCATCAAGTGT (EcoRI)<br>R: GTGGCGACCGGTggatccCAACAGCAGGCACTTCCT (BamHI)        | pLVX-DsRed |
| <b>Cdc42</b>      | F: ACCCAAGCTGgctagcATGCAGACGATTAAGTGTGTTG (NheI)<br>R: GCTCGGTACCaagcttAATATACAGCACTTCCTTTTG (HindIII)      | pcDNA3.1   |
| <b>Cdc42</b>      | F: CGAGCTCAAGCTTCgaattcATGCAGACGATTAAGTGTGTTG (EcoRI)<br>R: GTGGCGACCGGTggatccAATATACAGCACTTCCTTTTG (BamHI) | pLVX-DsRed |
| <b>N17Cdc42</b>   | F: CGAGCTCAAGCTTCgaattcATGCAGACGATTAAGTGTGTTG (NheI)<br>R: GTGGCGACCGGTggatccAATATACAGCACTTCCTTTTG (BamHI)  | pLVX-DsRed |
| <b>L61Cdc42</b>   | F: CGAGCTCAAGCTTCgaattcATGCAGACGATTAAGTGTGTTG (EcoRI)<br>R: GTGGCGACCGGTggatccAATATACAGCACTTCCTTTTG (BamHI) | pLVX-DsRed |
| <b>TGEV-S1</b>    | F: TCTAGCCCGGGCggatccTGTGCTAGTTATGTGGCT (BamHI)<br>R: ATCGTATGGGTAtctagaATTTGTATAATTATATATAGAG (XbaI)       | pLVX-HA    |
| <b>EGFR</b>       | F: CTCAAGCTTCgaattcATGCGACGCTCCTGGGCG (EcoRI)<br>R: GTGGCGACCGGTggatccTCATGCCCCAGTAAGG (BamHI)              | pLVX-DsRed |

**Table S4: List of primer sequences used in the site-directed mutagenesis**

| Name              | Primer sequence(5'-3')                                                                                               |
|-------------------|----------------------------------------------------------------------------------------------------------------------|
| <b>CofilinS3A</b> | F: TAGCATGGCC <b>GCA</b> GGTGTGGCTGTCTCTGACGGGGTCATCAAAG<br>R: CAGCCACACCT <b>TGC</b> GGCCATGCTAGCCAGCTTGGGTCTCCCTAT |
| <b>CofilinS3E</b> | F: TAGCATGGCC <b>GAA</b> GGTGTGGCTGTCTCTGACGGGGTCATCAAAG<br>R: CAGCCACACCT <b>TTC</b> GGCCATGCTAGCCAGCTTGGGTCTCCCTAT |
| <b>N19RhoA</b>    | F: TGTGGCAAGA <b>ATT</b> GTTTGCTCATTGTCTTAGCAAGGACCAAT<br>R: GAGCAAACA <b>AT</b> TCTTGCCACAGGCTCCATCACCAACAATCAC     |
| <b>L63RhoA</b>    | F: ACAGCAGGACT <b>TGGA</b> AAGATTATGATCGTTTGAGGCCCCCT<br>R: ATAATCTTCC <b>AGT</b> CCTGCTGTGTCCCACAAAGCCAACCTCA       |
| <b>N17Rac1</b>    | F: GTGGGTAAAA <b>ATT</b> GCCTGATCAGTTACACGACCAATGC<br>R: CAGGAGGCA <b>ATTTT</b> TACCCACAGCTCCGTCTCCCACCACCA          |
| <b>L61Rac1</b>    | F: ACGGCTGGACT <b>AGA</b> AAGATTACGACCGGTTACGTCCCCTGTC<br>R: GTAATCTTCT <b>AGT</b> CCAGCCGTATCCATAAGCCCAGATTCA       |
| <b>N17Cdc42</b>   | F: GTTGGTAAAA <b>ACT</b> GTCTCCTGATATCCTACACGACAAACAAT<br>R: TCAGGAGACAG <b>TTTTT</b> TACCAACGGCACCATCGCCCACAACAAC   |
| <b>L61Cdc42</b>   | F: ACTGCAGGG <b>CT</b> AGAGGATTATGACAGATTACGACCGCTGAG<br>R: ATAATCCTCT <b>AGC</b> CTGCAGTATCAAAAAGTCCAAGAGTAT        |

**TableS 5: List of RNA interferences.**

| <b>Name</b>     | <b>mRNA accession</b> | <b>Targeting sequence</b>                                                                                                                                          |
|-----------------|-----------------------|--------------------------------------------------------------------------------------------------------------------------------------------------------------------|
| <b>Cofilin1</b> | NM_001004043          | <b>shCof1:</b> GGGTCATCAAAGTGTTCAATG<br><b>shCof2:</b> GGTCATCAAAGTGTTCAATGA<br><b>shCof3:</b> GCGAGGACAAGAAGAACATCA<br><b>shCof ctrl:</b> CAAAGTGTTCAATGAGGTCAT   |
| <b>EGFR</b>     | NM_214007.1           | <b>shEGFR1:</b> GCAGATCATCCGAGGAAATG<br><b>shEGFR2:</b> GCCATGGGCCACATCTGTAAC<br><b>shEGFR3:</b> GGCATGAACTATCTGGAAGA<br><b>shEGFR ctrl:</b> GCCACATCTGTAACGCCATGG |
